# Supplementary material
Source: publisher figshare collection journal article supplement (https://tandf.figshare.com/articles/dataset/_/3113017)
Supplement: Supplementary file 1 [file 2]

## Supplementary Figure 2

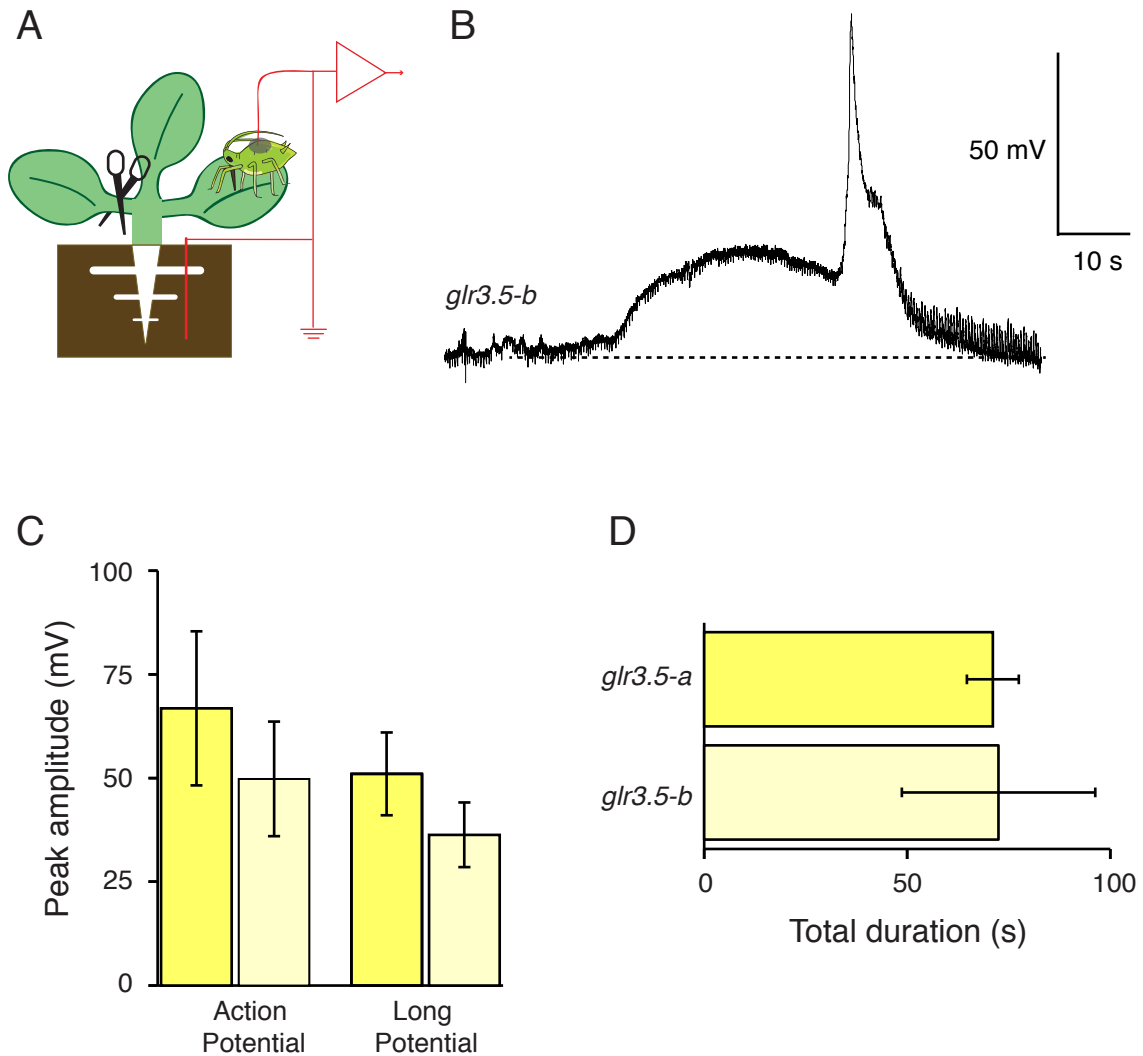

Supplementary Figure 2. The *Arabidopsis thaliana glr3.5-b* allele generates potentials between the root electrode and the SE/CC electrode in a non-neighbor leaf, with respect to the wounded leaf. (A) Experimental design. (B) Typical EPG recording in E2 feeding phase, in the configuration shown in (a), containing a long potential and a transient potential induced by leaf-cutting. (C) Comparison between the amplitudes of the transient and long potentials in the *glr3.5-a* (dark yellow) and *glr3.5-b* (light yellow) alleles. (D) Average durations of the entire wound-induced potential in the *glr3.5-a* and *glr3.5-b* (light yellow). Bars represent mean  $\pm$  s.e.m. N = 4-5.
