# Supplementary material
Source: publisher figshare collection journal article supplement (https://tandf.figshare.com/articles/dataset/_/3113017)
Supplement: Supplementary file 2 [file 2]

Archive with 2 entries (2 files):
- Supplementary Figure 1.pdf
- Supplementary Figure 2.pdf
