# Supplementary material
Source: publisher figshare collection journal article supplement (https://tandf.figshare.com/articles/dataset/_/3113017)
Supplement: Supplementary file 2 [file 2 › Supplementary Figure 1.pdf]

## Supplementary Figure 1

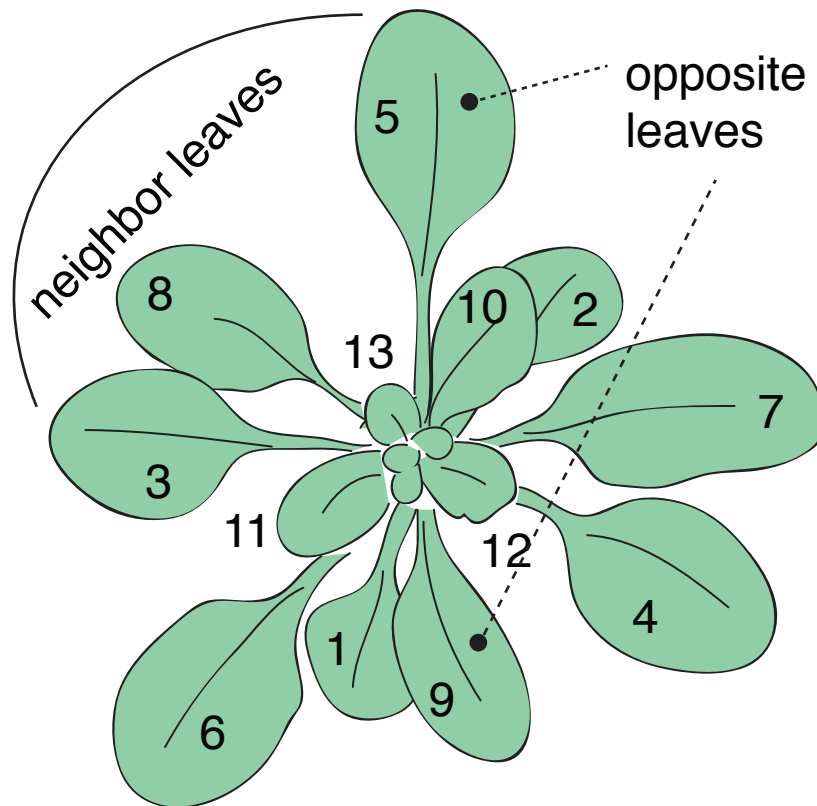

Supplementary Figure 1. Numbering of the leaves in the *Arabidopsis thaliana* rosette. The leaf number corresponds to its order of appearance during development. The vasculature of a leaf in *A. thaliana* is more directly coupled with the vasculature of a neighbor leaf than with the vasculature of an opposite leaf (ref. 33).
